# Supplementary material for: ACTH(6-9)PGP Peptide Protects SH-SY5Y Cells from the H2O2, tert-Butyl Hydroperoxide, and Cyanide Cytotoxicity via Prolif-eration Stimulation and Antioxidant-related Genes Induction
Source: Preprints.org preprint supplement (doi:10.20944/preprints202103.0139.v1), 2021-03-03
Supplement: Supplementary file 1 [file supplementary]

**Figure S1.** GPR55 and GPR18 participation in ACTH(6-9)PGP protection against the KCN cytotoxicity for the SH-SY5Y cells. Inhibitors ML-193 (2 µM) and PSB C5 (0.5 µM) were added 1 h before the KCN, and then together with KCN (950 µM) and peptide (50 µM). The cells were incubated with the inhibitors, KCN, and peptide for 24 h. MTT assay data, mean±standard error. *, statistically significant difference from the KCN+peptide without any inhibitor; **, statistically significant difference from the untreated control, p≤0.05, ANOVA with the Tukey post-test, N=3 experiments.
